# Supplementary material for: Structure of a fully assembled tumor-specific T cell receptor ligated by pMHC
Source: PubMed Central journal article supplement (PMC9630439; doi:10.1016/j.cell.2022.07.010), 2022-08-18
Supplement: mmc1.pdf [file mmc1.pdf]

**Cell, Volume 185**

**Supplemental information**

**Structure of a fully assembled tumor-specific**

**T cell receptor ligated by pMHC**

**Lukas Sušac, Mai T. Vuong, Christoph Thomas, Sören von Bülow, Caitlin O'Brien-Ball, Ana Mafalda Santos, Ricardo A. Fernandes, Gerhard Hummer, Robert Tampé, and Simon J. Davis**

**Table S1 | Cryo-EM data collection, refinement, and validation statistics**

---

| <b>gp100/HLA-A2/TCR-CD3 complex</b>                 |                 |
|-----------------------------------------------------|-----------------|
| (EMDB-13427; PDB 7PHR)                              |                 |
| <b>Data collection and processing</b>               |                 |
| Microscope                                          | TITAN-Krios     |
| Camera                                              | Gatan K2 Summit |
| Magnification                                       | 130,000         |
| Voltage (kV)                                        | 300             |
| Electron exposure (e <sup>-</sup> /Å <sup>2</sup> ) | 62              |
| Defocus range (μm)                                  | -1.2 to -2.2    |
| Pixel size (Å)                                      | 1.05            |
| Symmetry imposed                                    | C1              |
| Initial particle images (no.)                       | 450,996         |
| Final particle images (no.)                         | 154,408         |
| Map resolution (Å)                                  | 3.08            |
| FSC threshold                                       | 0.143           |
| Map resolution range (Å)                            | 2.61 to 5.05    |
| <b>Refinement</b>                                   |                 |
| Map sharpening <i>B</i> factor (Å <sup>2</sup> )    | -78.6           |
| Model composition                                   |                 |
| Non-hydrogen atoms                                  | 11,511          |
| Protein residues                                    | 1,443           |
| Ligands                                             | 6 (NAG)         |
| <i>B</i> factors (Å <sup>2</sup> )                  |                 |
| Protein                                             | 41.97           |
| Ligands                                             | 43.07           |
| R.m.s. deviations                                   |                 |
| Bond lengths (Å)                                    | 0.0055          |
| Bond angles (°)                                     | 0.77            |
| Validation                                          |                 |
| MolProbity score                                    | 1.41            |
| Clashscore                                          | 5.35            |
| Poor rotamers (%)                                   | 0.08            |
| Ramachandran plot                                   |                 |
| Favored (%)                                         | 97.40           |
| Allowed (%)                                         | 2.60            |
| Disallowed (%)                                      | 0.00            |

---
